# Supplementary material
Source: PubMed Central journal article supplement (PMC8262769)
Supplement: NIHMS1643913-supplement-sm2.pdf [file NIHMS1643913-supplement-sm2.pdf]

# Statistical Analysis of Data in Figures 1-6

**Figure 1**

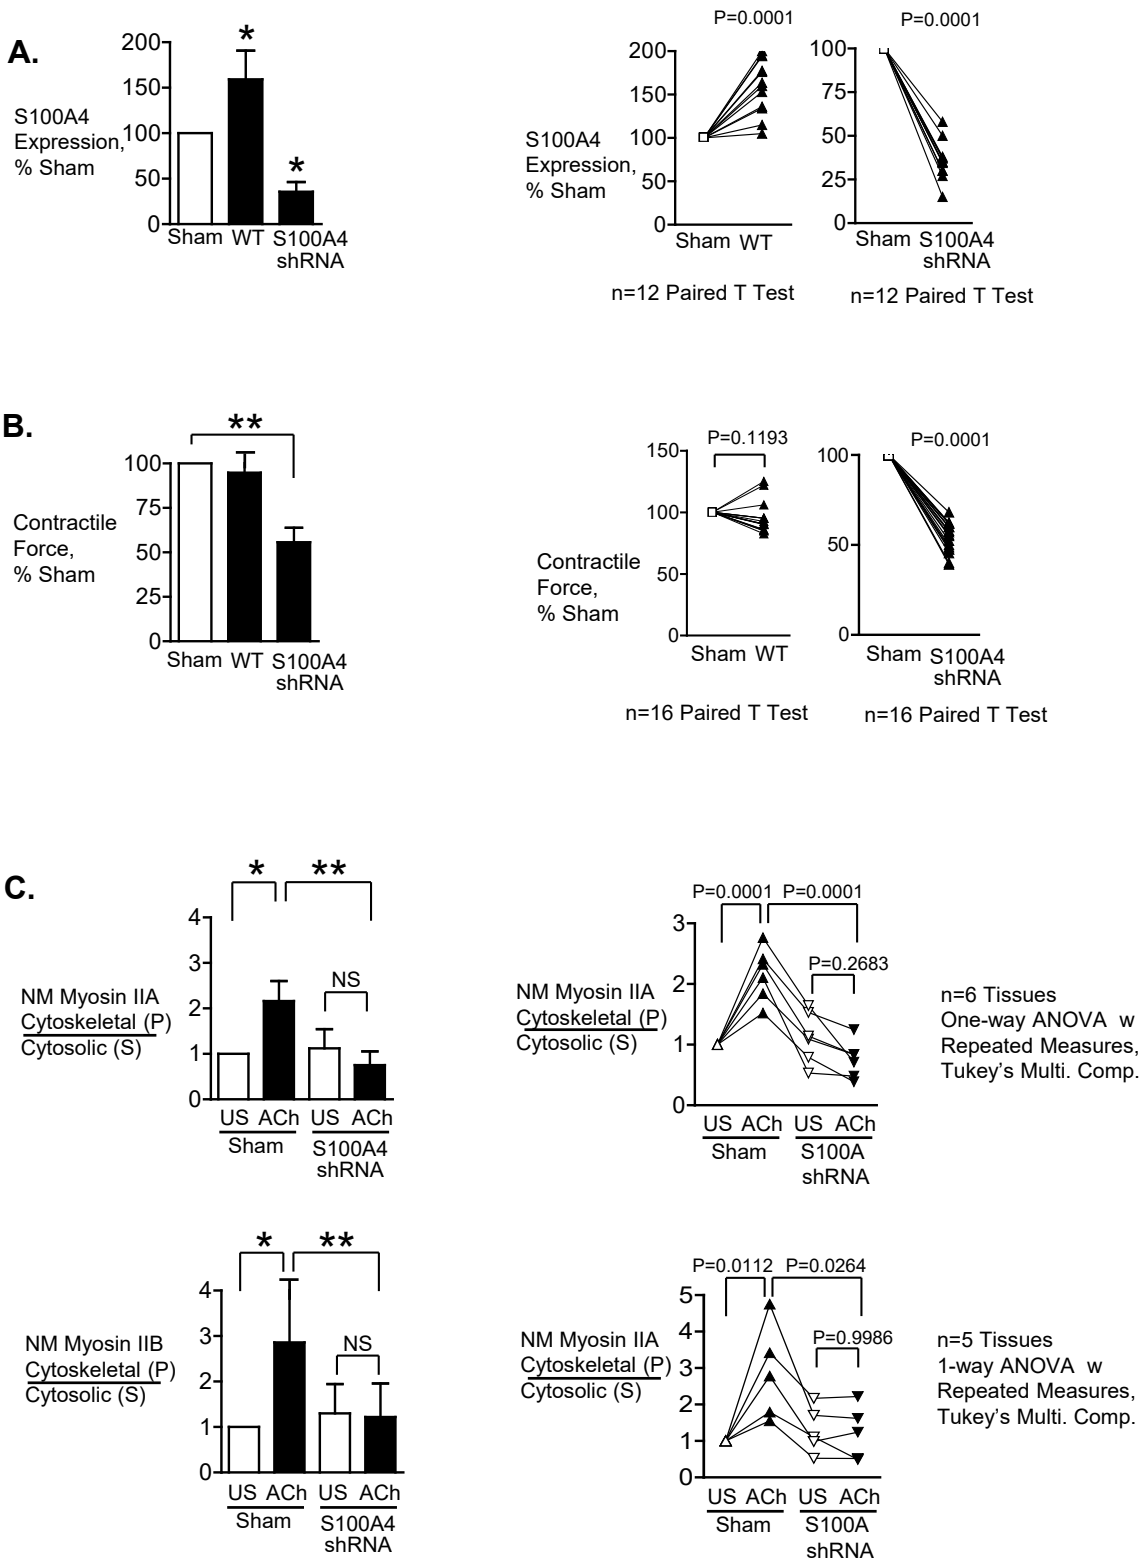

**Figure 1**

**D.**

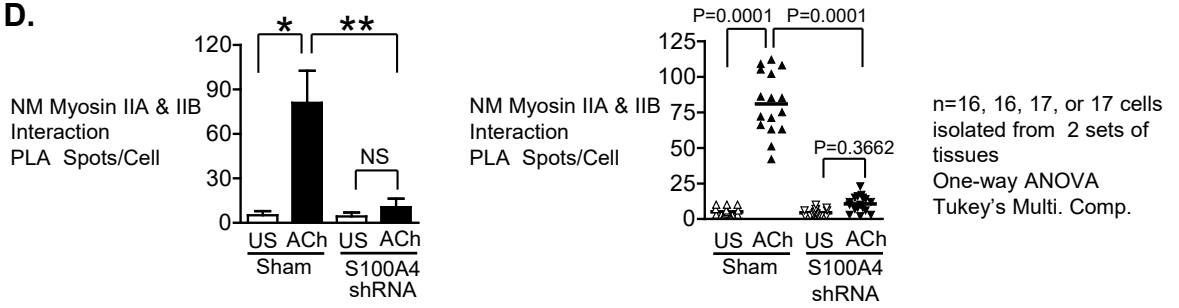

**E.**

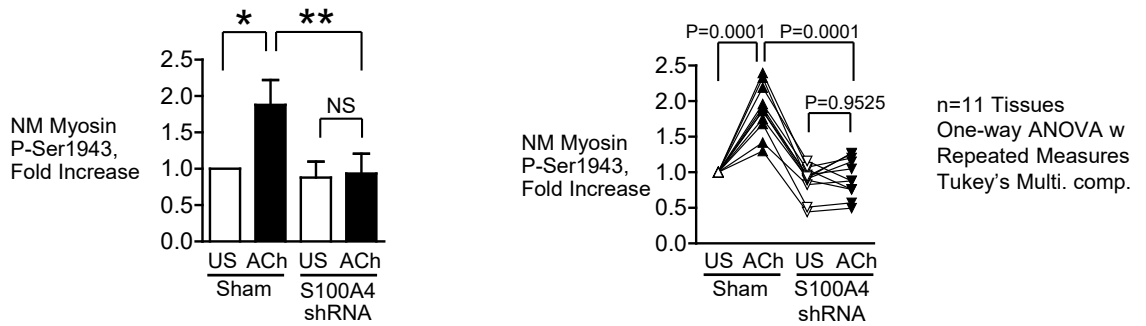

**Figure 2**

**A.**

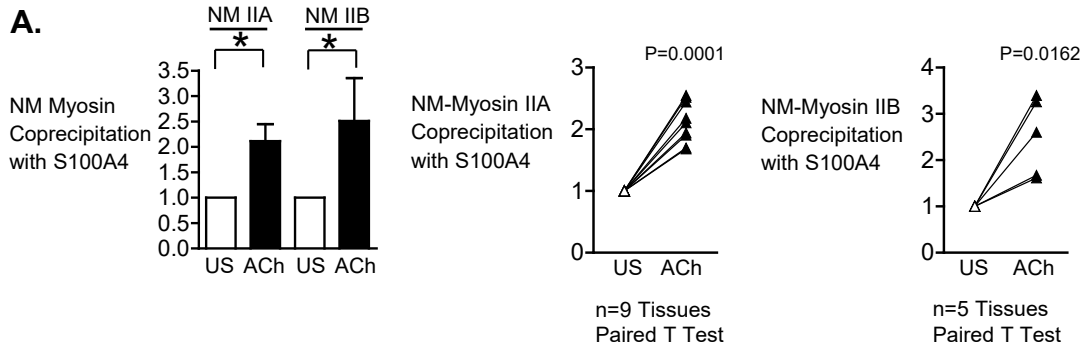

**B.**

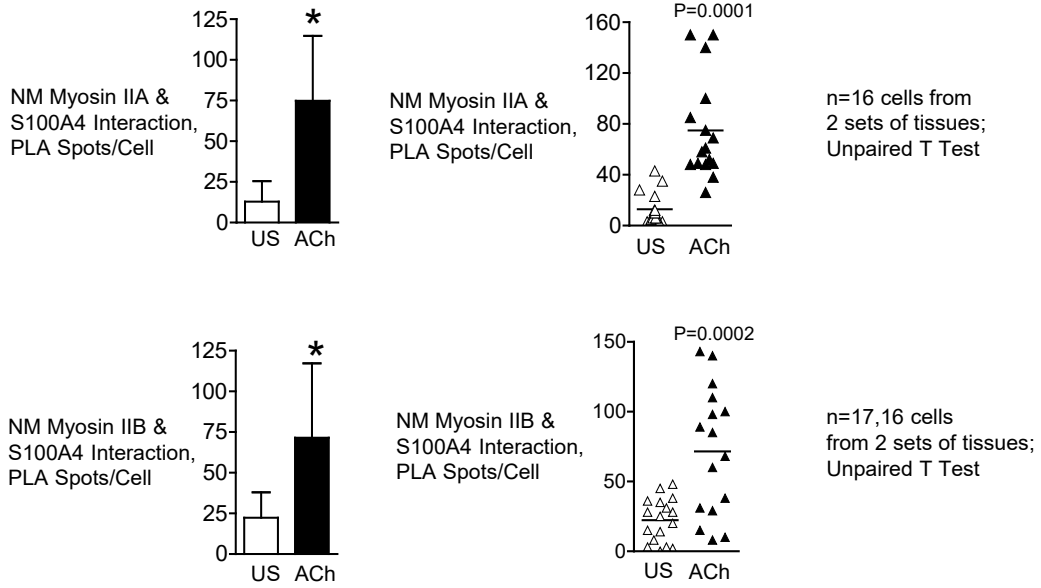

**C.**

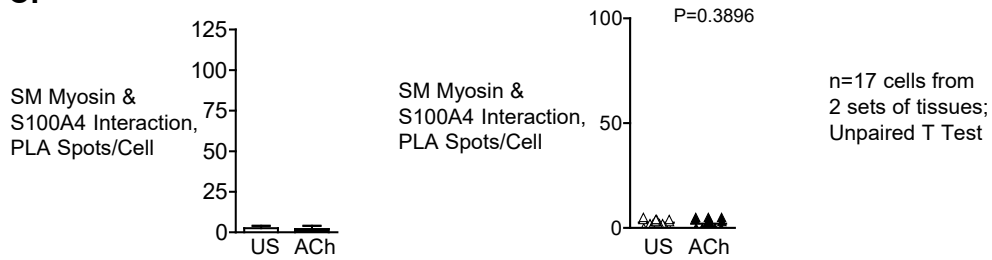

**Figure 3.**

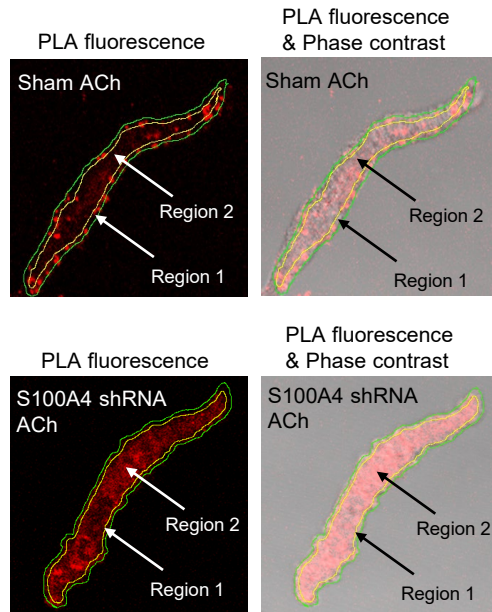

Method for quantitation of paxillin-vinculin interactions detected by Duolink PLA in freshly dissociated smooth muscle cells (Fig. 3A).

Fluorescent and phase contrast images are shown for a single ACh stimulated cell. Localization of vinculin-paxillin interaction was analyzed by the ratio of pixel intensity between the cell periphery and the cell interior. A region containing the membrane compartment (region 1) was separated from the cell cytoplasmic compartment (region 2) by a line about 1  $\mu\text{m}$  inside the cell membrane. The ratio of fluorescence intensity between the membrane compartment and the cytoplasmic compartment was calculated.

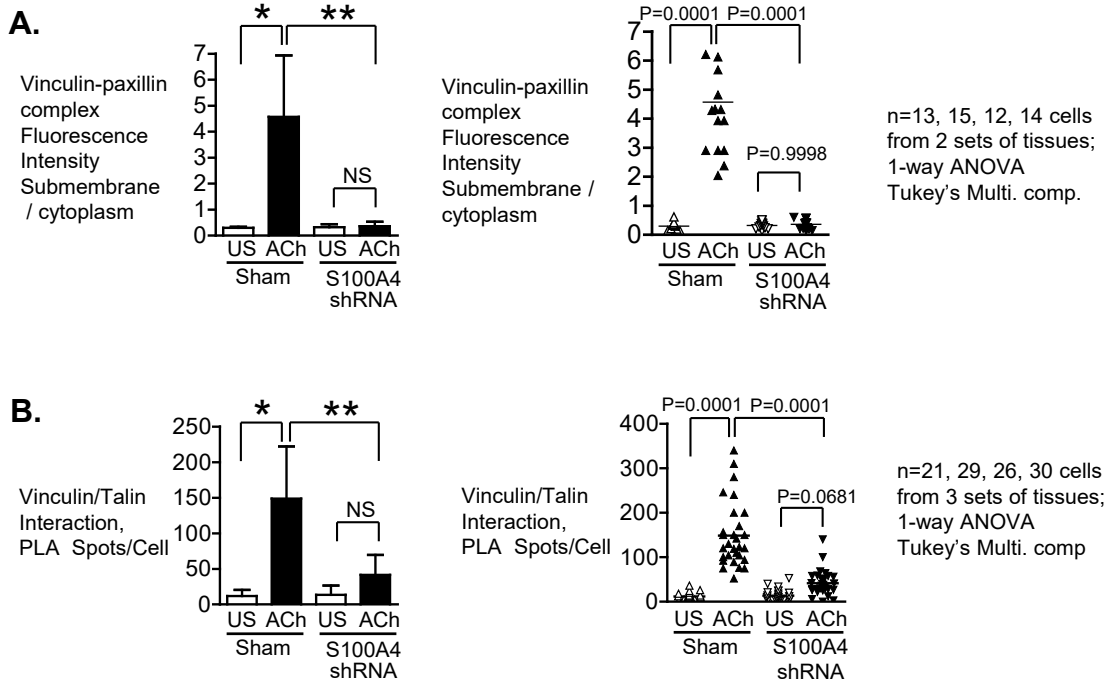

**Figure 3**

**C.**

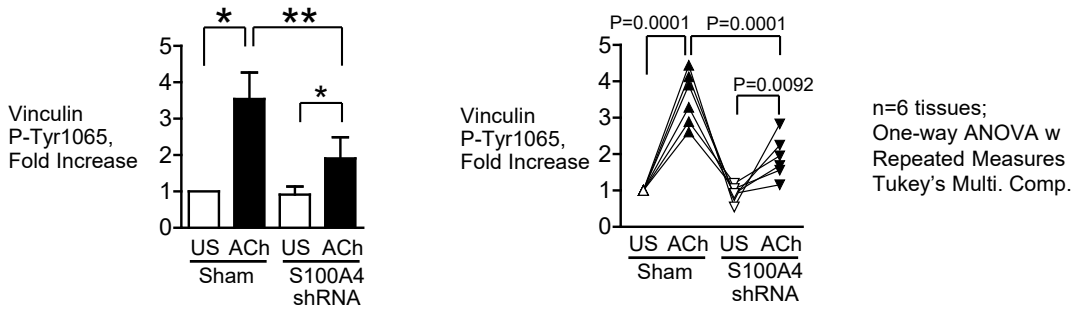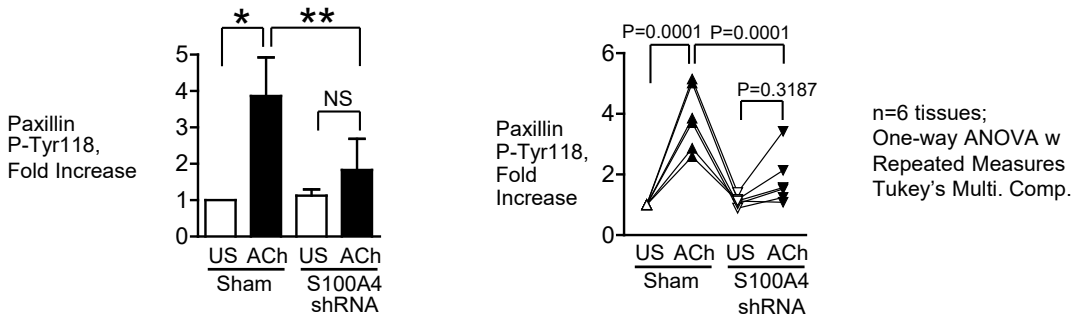

**D.**

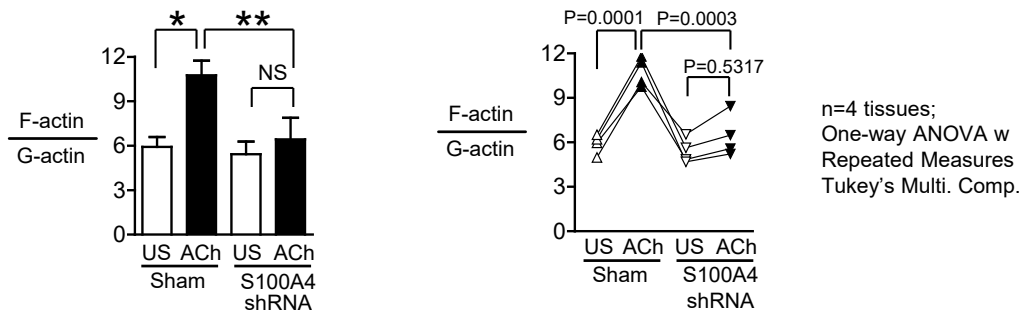

**E.**

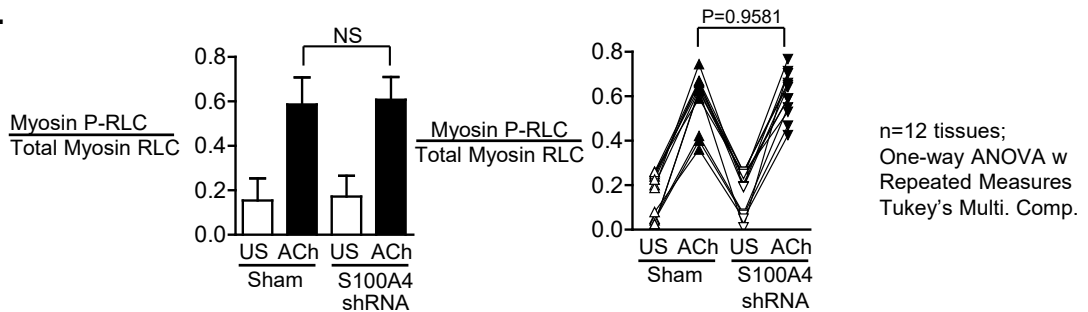

**Figure 4**

**A.**

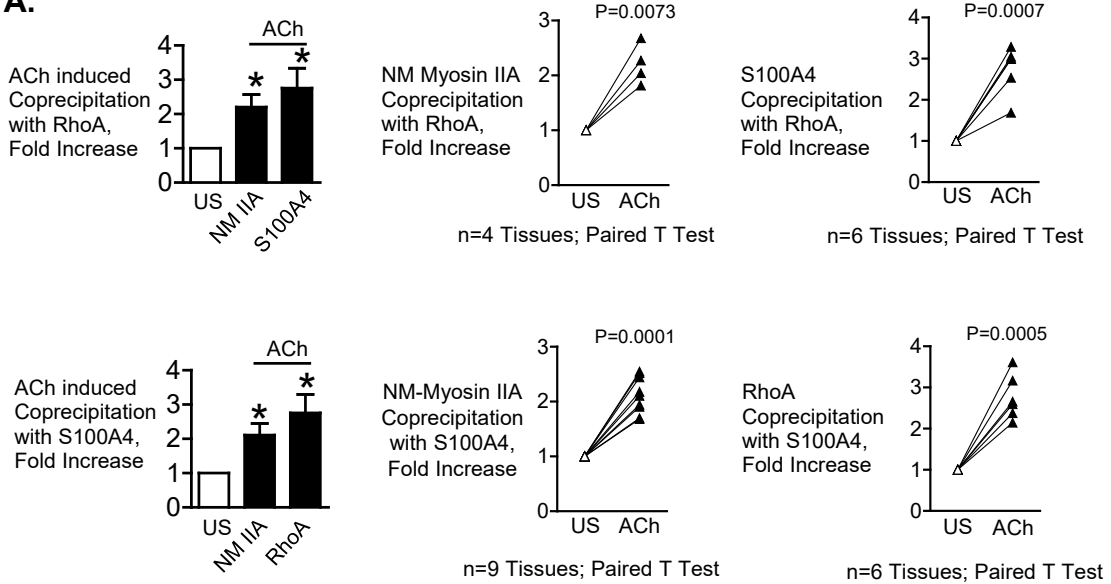

**B.**

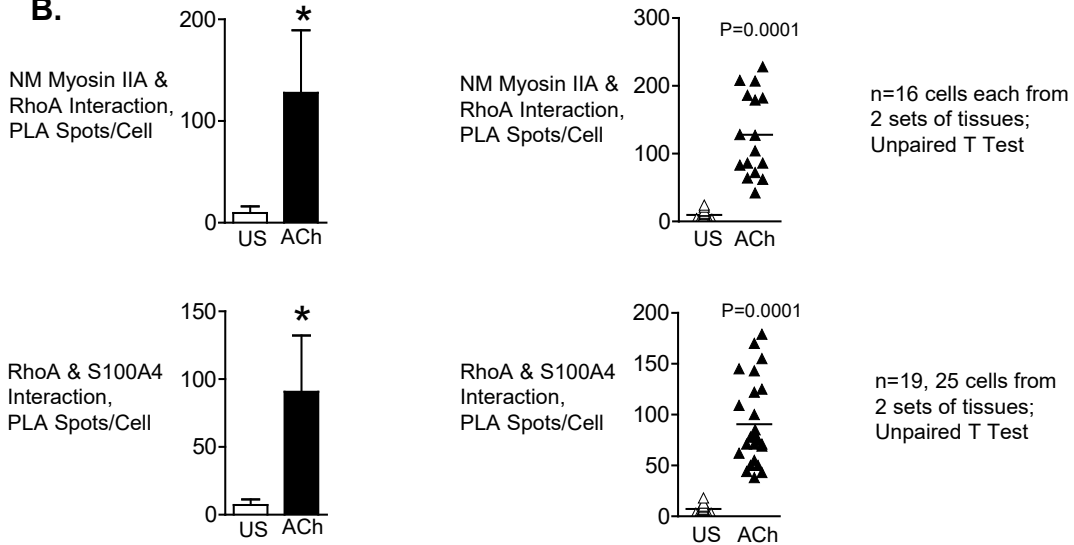

# Figure 4

## C.

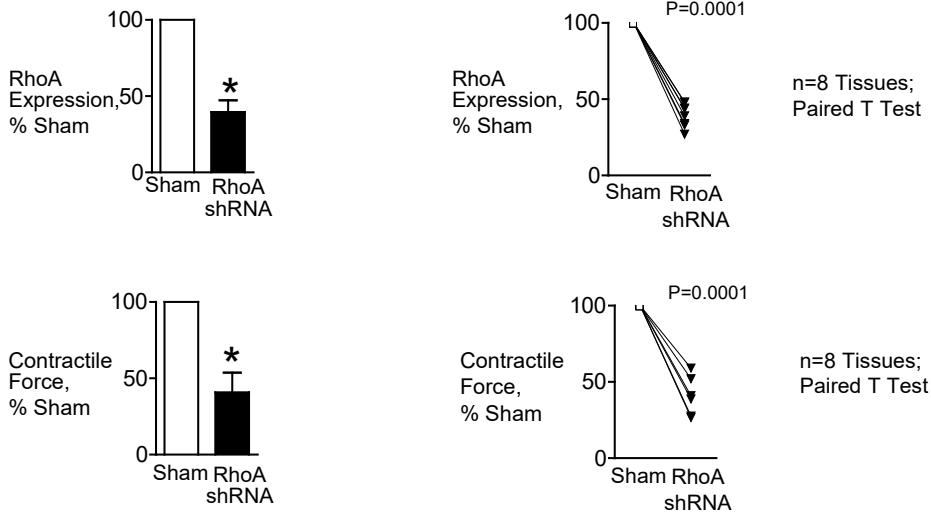

## D.

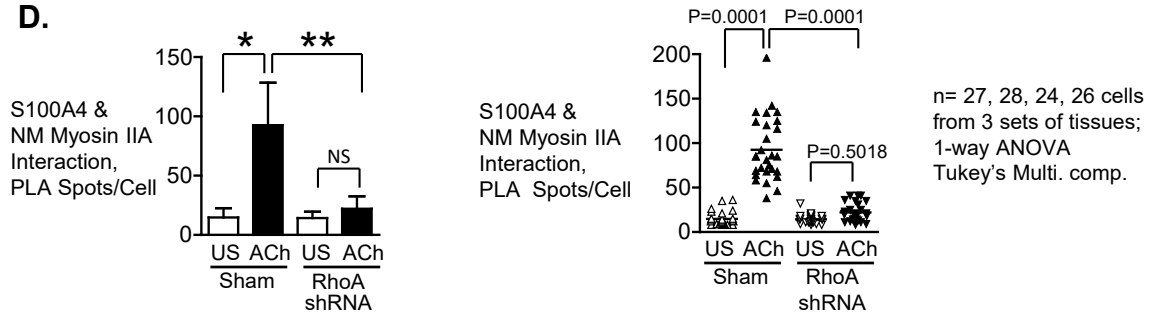

## E.

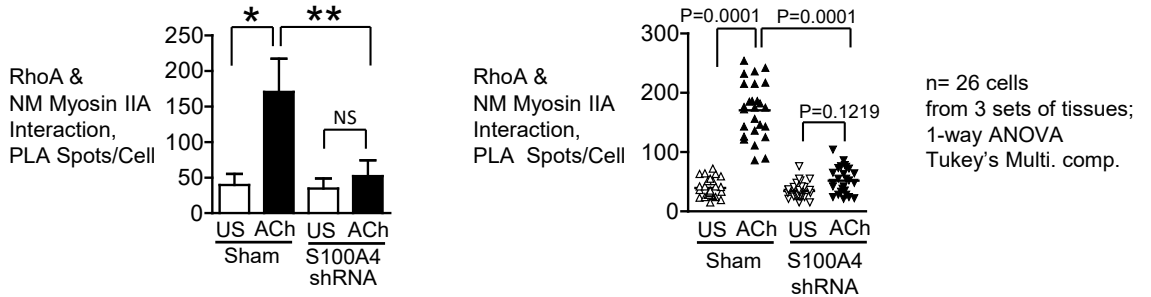

**Figure 5**

**A.**

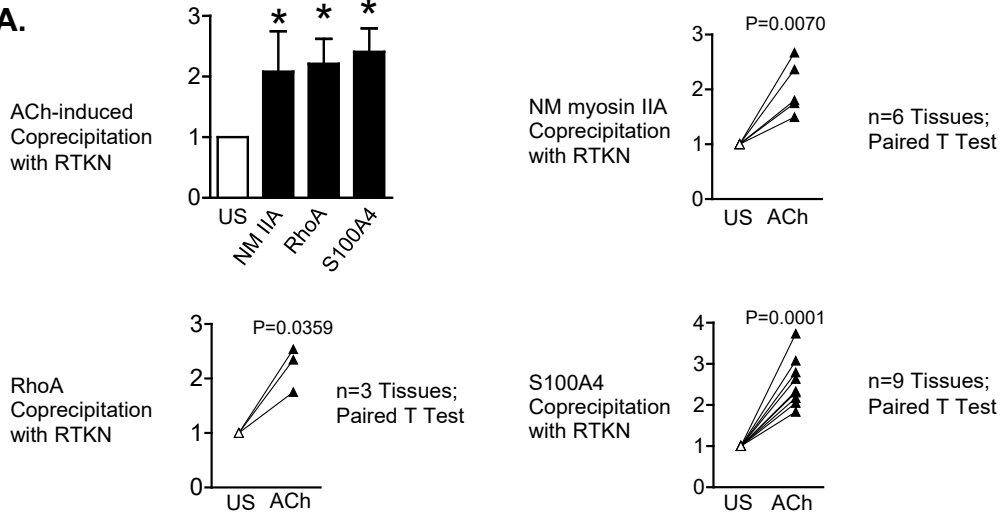

**B.**

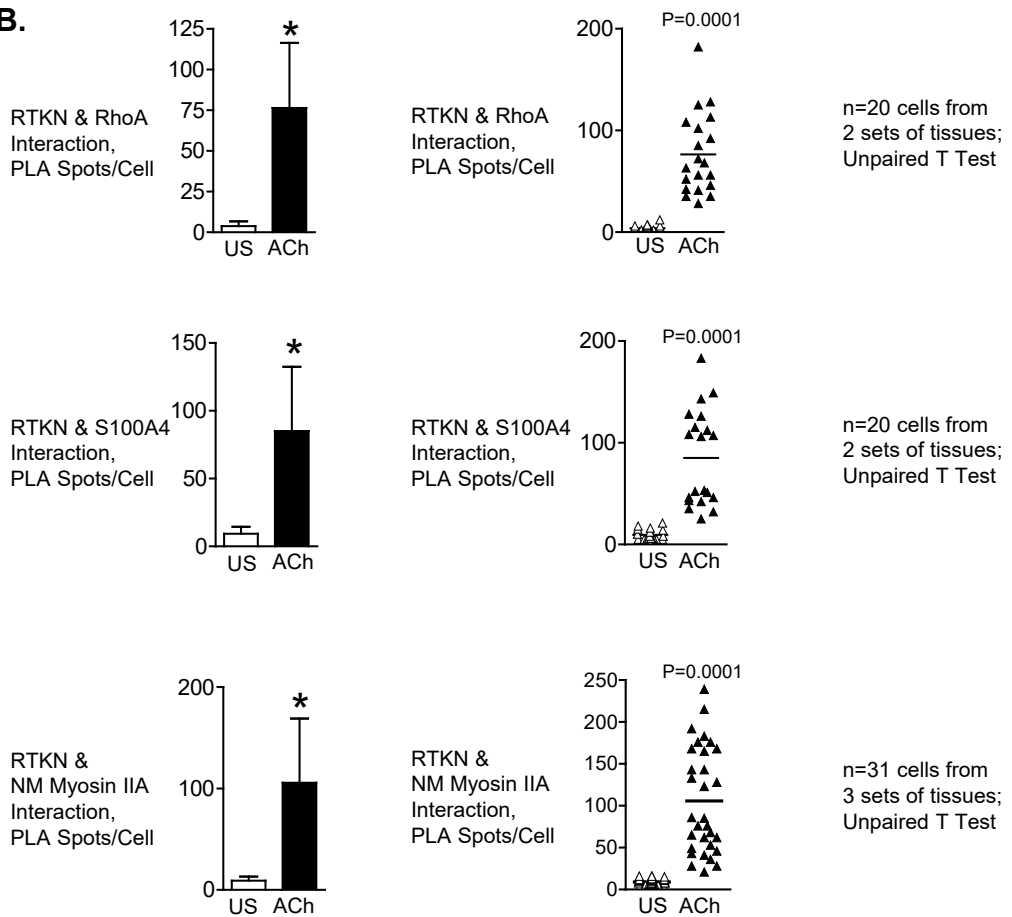



**Figure 5**

**C.**

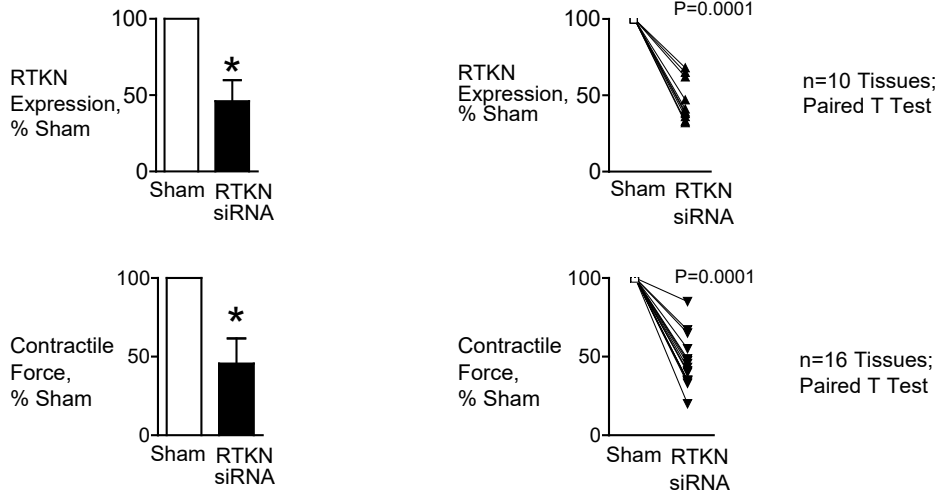

**D.**

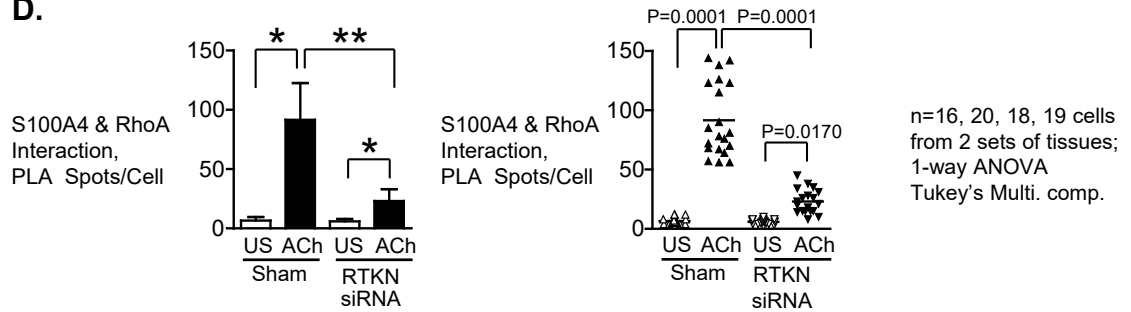

**Figure 6**

**A.**

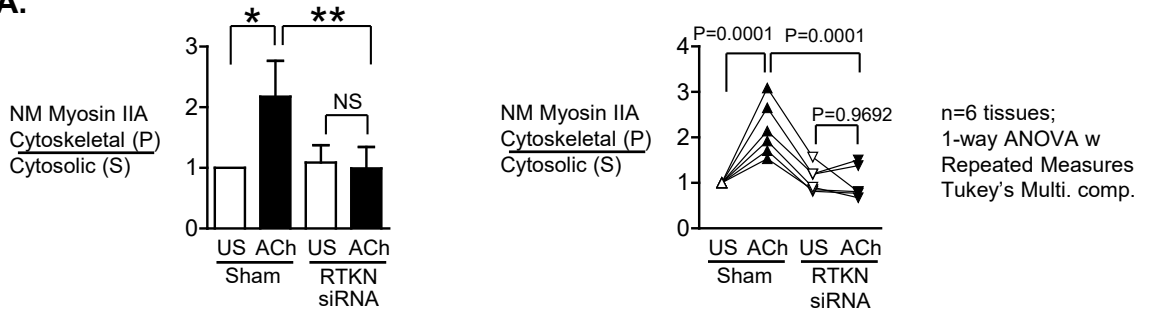

**B.**

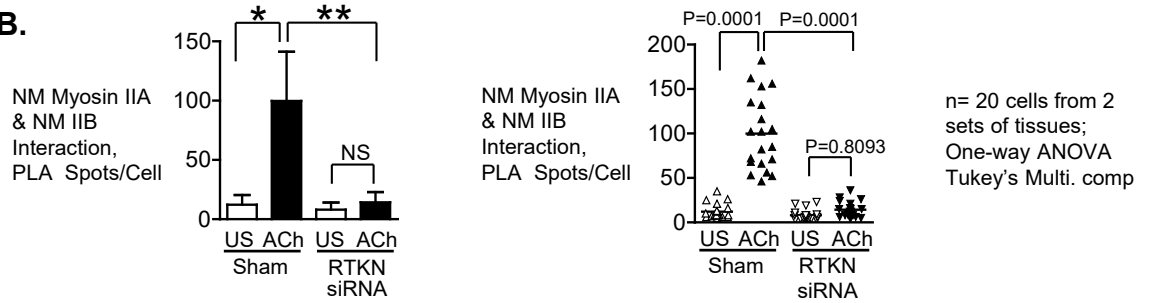

**C.**

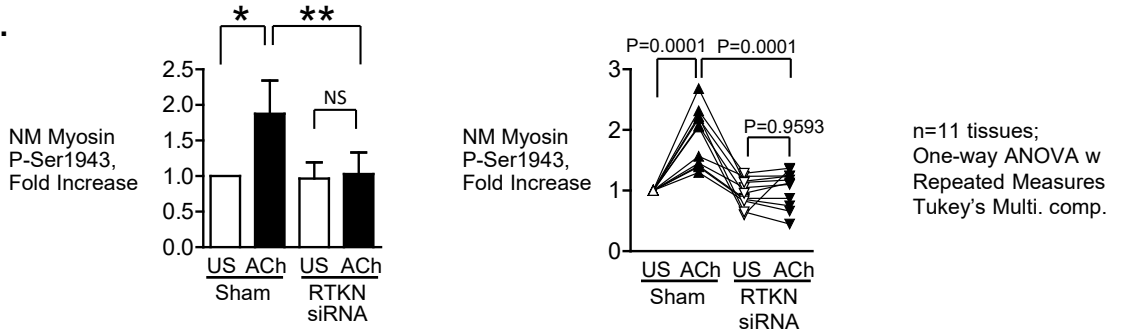

**Figure 6**

**D.**

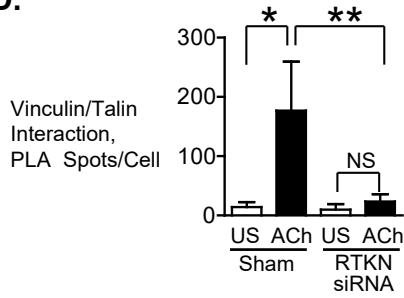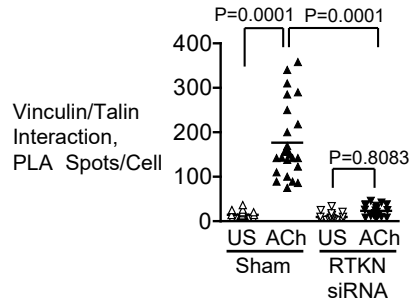

n= 19, 25, 18, 20 cells from 2 sets of tissues; One-way ANOVA Tukey's Multi. comp.

**E.**

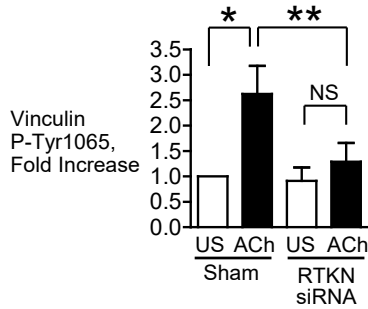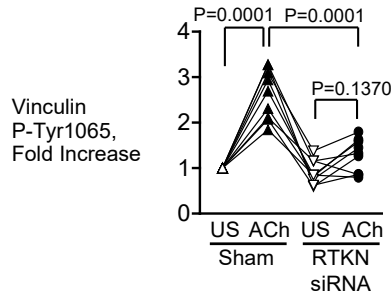

n=9 tissues; One-way ANOVA w Repeated Measures Tukey's Multi. comp.

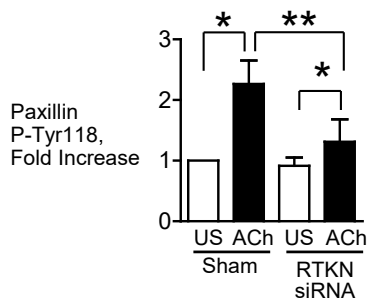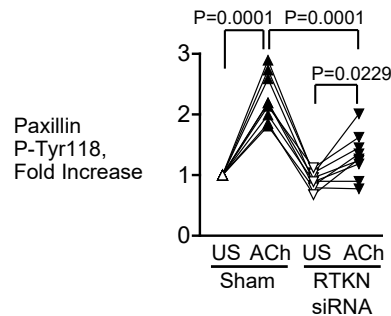

n=9 tissues; One-way ANOVA w Repeated Measures Tukey's Multi. comp.
